# Supplementary material for: Reactive adsorption of NO2 over the NaCoO2–Co3O4 nanocomposite: experimental study and first-principles calculations
Source: Royal Society of Chemistry journal article supplement (doi:10.1039/d3nj03781a), 2023-01-01
Supplement: d3nj03781a1.pdf [file d3nj03781a1.pdf]

## ESI file for

### Reactive adsorption of NO<sub>2</sub> over NaCoO<sub>2</sub>-Co<sub>3</sub>O<sub>4</sub> nanocomposite: Experimental study and first-principles calculations

Nishesh Kumar Gupta<sup>a,b,1</sup>, Kaptan Rajput<sup>c,d,1</sup>, Bijal R. Mehta<sup>c</sup>, Herlys Viltres<sup>e</sup>, Debesh R. Roy<sup>c</sup>, Kwang Soo Kim<sup>a,b\*</sup>

#### Section 1: Synthesis of (Na,Co)-BTC MOF

The MOF was prepared by sonicating (Sonics Vibra-cell 500 W, 20 kHz, 44% amplitude) freshly prepared cobalt hydroxide with H<sub>3</sub>BTC solution (0.21 mol L<sup>-1</sup> in DMF). Cobalt hydroxide was prepared by adding 82.5 mL of methanolic NaOH solution (1.30 mol L<sup>-1</sup>) in 75 mL of Co(NO<sub>3</sub>)<sub>2</sub>·6H<sub>2</sub>O salt solution in DMF (0.55 mol L<sup>-1</sup>).

#### Section 2: Analytical instruments

The surface morphology was probed by a Hitachi S-4300 field emission scanning electron microscope (FE-SEM, Japan). The dried samples were coated with Au-Pt alloy using an E-1048 Hitachi ion sputter to improve the signal-to-noise ratio. The 2D elemental mapping was performed on an X-Maxn 80 T energy-dispersive X-ray spectroscope (Oxford, United Kingdom). Fourier-transform infrared (FTIR) spectra were recorded on a Cary670 FTIR spectrometer. Powder X-ray diffraction (PXRD) patterns were recorded at 25 °C on an Ultima IV X-ray diffractometer (Rigaku, Japan) with Cu K $\alpha$  radiation ( $\lambda = 1.5406 \text{ \AA}$ ) and a Ni filter. Thermal gravimetric analysis (TGA) of MOF was performed on a TG 209 F3 Thermogravimetric Analyzer (NETZSCH, Germany). N<sub>2</sub> adsorption-desorption measurements were conducted on Quantachrome Instruments v10.0 (Florida, United States) after degassing samples at 120 °C for 6 h. The chemical states of constituent elements were analyzed using an X-ray photoelectron spectrometer (XPS, Nexsa spectrometer system, Thermo Scientific, United Kingdom) focused with Al K $\alpha$  monochromator (1486.6 eV). Spectra were charge corrected to the main line of the C 1s spectrum (aromatic carbon) set to 284.7 eV. Spectra were analyzed using CasaXPS software (version 2.3.14) with GL(p) = Gaussian/Lorentzian product formula, where the mixing is determined by  $m = p/100$ , GL(100) is a pure Lorentzian, and GL(0) is a pure Gaussian. We have used GL(30) in this study.

#### Section 3: DFT calculations

A spin-polarized density functional theory (DFT) <sup>1,2</sup> investigation was conducted to study the bare and NO<sub>2</sub> gas molecule adsorbed Co<sub>3</sub>O<sub>4</sub> and NaCoO<sub>2</sub> surface by utilizing the Vienna ab initio simulation package (VASP) <sup>3</sup>. VASP package incorporates the projector augmented wave (PAW) and generalized gradient approximation (GGA) methods to properly include the interactions between ions and electrons <sup>4,5</sup>. For all the structural and electronic properties calculations, cutoff energy of 500 eV, and the Brillouin-zone integration using a Monkhorst-Pack scheme <sup>6</sup> with a  $5 \times 5 \times 1$  k-point grid was considered. We enforced the convergence criteria for the total energy and atomic forces as 10<sup>-4</sup> eV and 0.02 eV/Å, respectively. To describe the adsorption of the NO<sub>2</sub> gas molecules on the Co<sub>3</sub>O<sub>4</sub> and NaCoO<sub>2</sub> surface accurately, we considered the van der Waals

interaction using the DFT-D3 method <sup>7</sup>. For the surface interaction study with NO<sub>2</sub> gas molecule on Co<sub>3</sub>O<sub>4</sub> and NaCoO<sub>2</sub> surfaces and removing the interaction between the imaginary surfaces, we considered a 15 Å vacuum region in the Z direction. For the graphical representations, we considered the VESTA package <sup>8</sup>. The adsorption energy ( $E_{ad}$ ) of the NO<sub>2</sub> gas molecule on the Co<sub>3</sub>O<sub>4</sub> and NaCoO<sub>2</sub> surface is obtained from the following equation (1):

$$E_{ad} = E_{Surface + NO_2} - E_{Surface} - E_{NO_2} \quad (1)$$

In the above equation, the initial three terms represent the ground state energy of the Co<sub>3</sub>O<sub>4</sub> or NaCoO<sub>2</sub> surface, the ground state energy of the isolated gas molecules, and the ground state energy of the complex configuration for the NO<sub>2</sub> gas molecule, respectively. To obtain the donor and acceptor nature of the NO<sub>2</sub> gas molecule, we considered the Bader charge analysis <sup>9</sup>. The formulation for the charge density difference ( $\Delta\rho$ ) is reported as:

$$\Delta\rho = \rho_{Surface + NO_2} - \rho_{NO_2} - \rho_{Surface} \quad (2)$$

In the above equation, the first three terms on the right-hand side describe the charge density of the complex system, the charge density of the isolated gas molecules, and the charge density of the Co<sub>3</sub>O<sub>4</sub> or NaCoO<sub>2</sub> surface, respectively.

## References

1. P. Hohenberg, W. Kohn, Phys. Rev., 1964, 136, B864.
2. W. Kohn, L. J. Sham, Phys. Rev., 1965, 140, A1133.
3. G. Kresse, J. Furthmüller, Phys. Rev. B, 1996, 54, 11169.
4. P. E. Blöchl, Phys. Rev. B, 1994, 50 (24), 17953.
5. J. P. Perdew, K. Burke, M. Ernzerhof, Phys. Rev. Lett., 1996, 77 (18), 3865.
6. H. J. Monkhorst, J. D. Pack Phys. Rev. B, 1976, 13 (12), 5188–5192.
7. S. Grimme, J. Comput. Chem., 2006, 27 (15), 1787–1799.
8. K. Momma, F. Izumi, J. Appl. Crystallogr., 2008, 41 (3), 653–658.
9. G. Henkelman, A. Arnaldsson, H. Jónsson, Comput. Mater. Sci., 2006, 36 (3), 354–360.

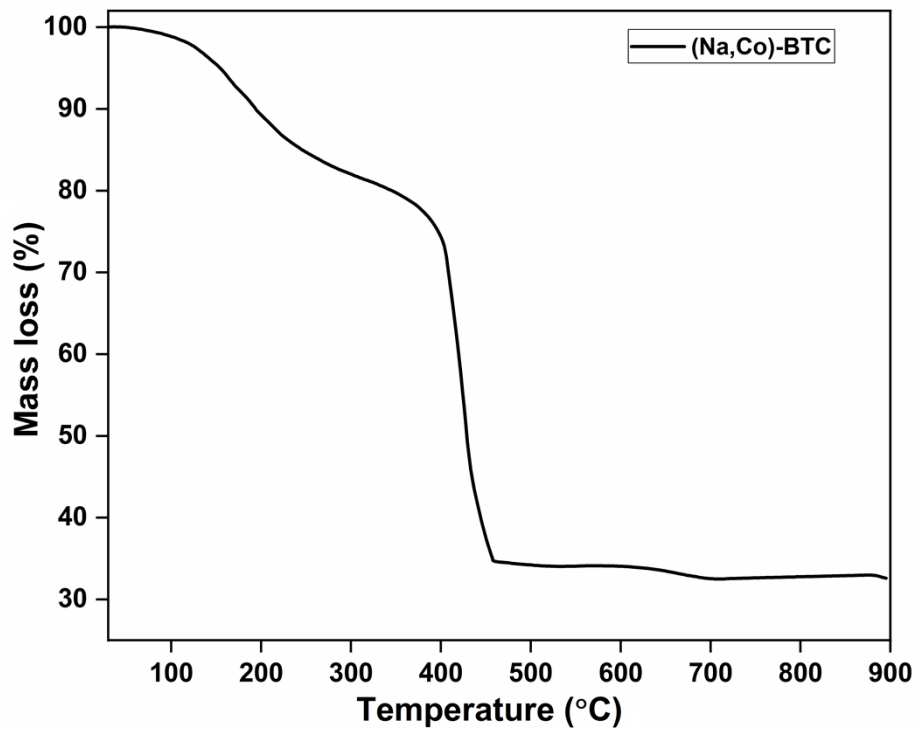

Figure S1. TGA profile of (Na,Co)-BTC.

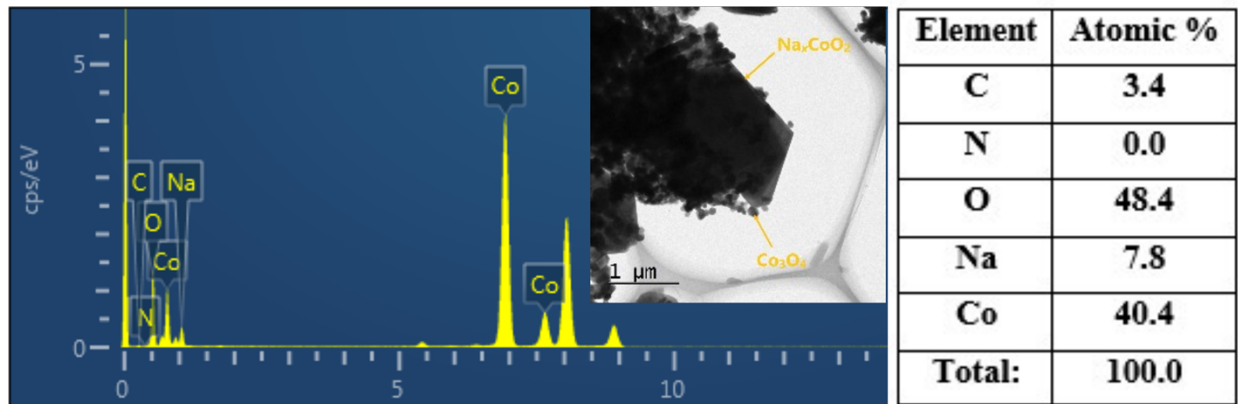

Figure S2. TEM-EDAX analysis of NaCoO.

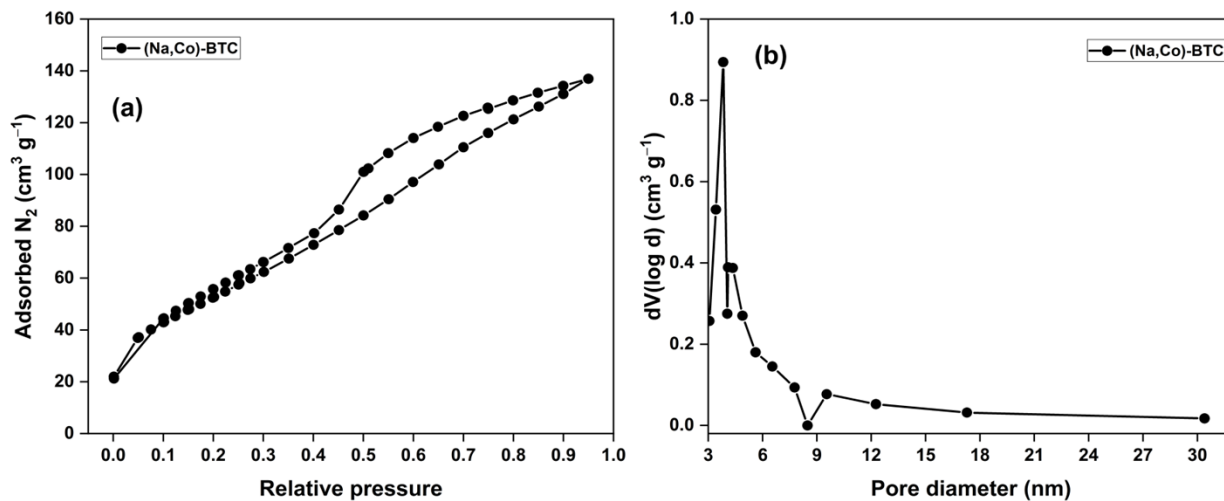

Figure S3. (a)  $N_2$  adsorption-desorption isotherm; (b) Pore size distribution of (Na,Co)-BTC.

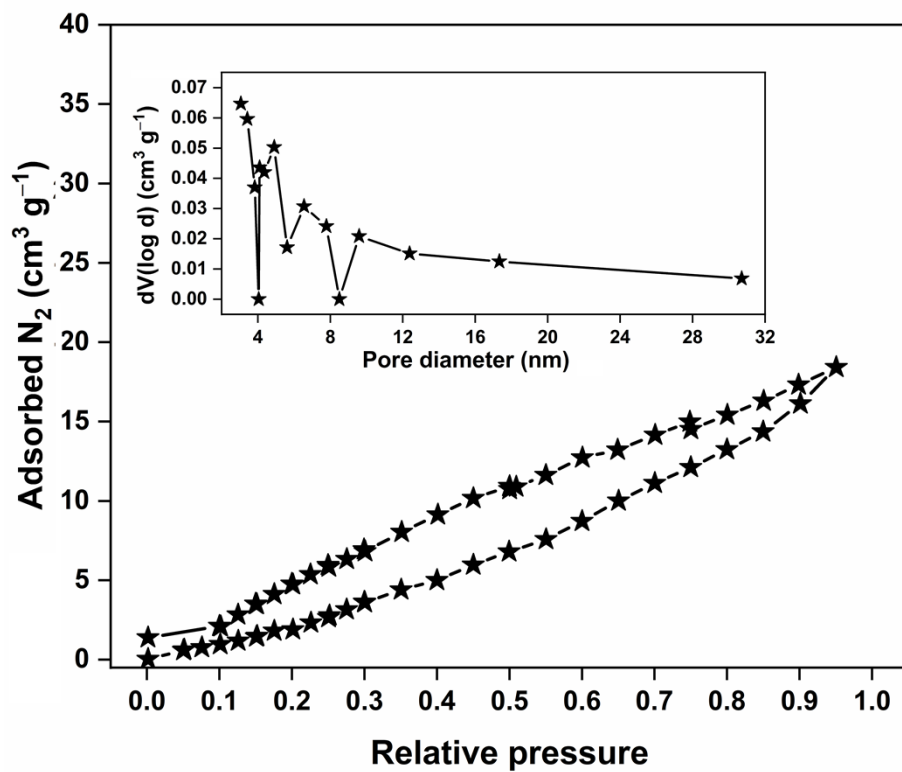

Figure S4.  $N_2$  adsorption-desorption isotherm (pore size distribution in inset).

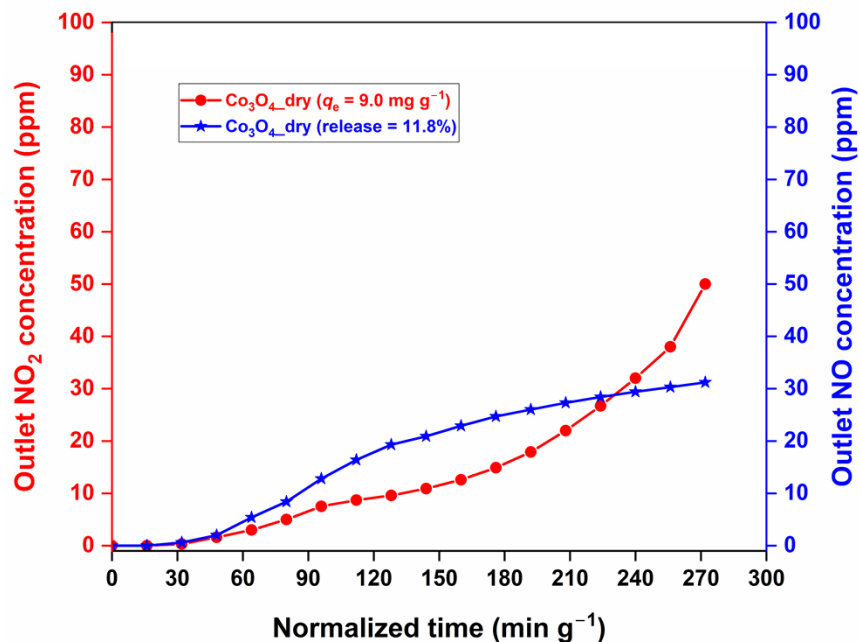

**Figure S5.** Outlet NO<sub>2</sub> and NO concentration as a function of normalized time for dry \*Co<sub>3</sub>O<sub>4</sub>.  
 Conditions:  $T = 25\text{ }^{\circ}\text{C}$ , mass = 0.25 g, flow rate = 0.2 L min<sup>-1</sup>.

\*Co<sub>3</sub>O<sub>4</sub> was prepared by air calcination of commercially procured Co(OH)<sub>2</sub> at 500 °C for 2 h in a muffle furnace.

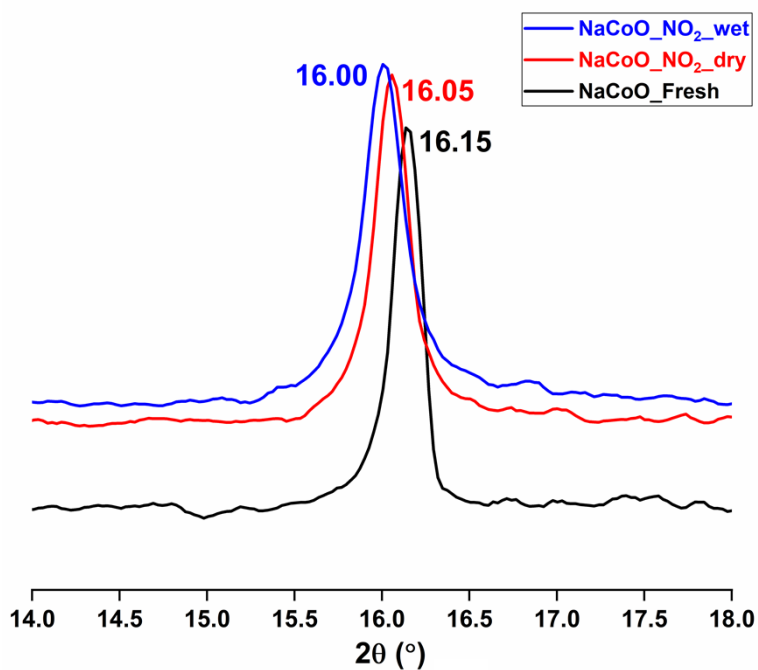

**Figure S6.** PXRD patterns ( $2\theta = 14\text{-}18^{\circ}$ ) of NO<sub>2</sub>-adsorbed NaCoO samples in dry and wet conditions.

**Table S1.** Atomic composition of fresh and NO<sub>2</sub>-exposed NaCoO samples.

| Samples                    | Elements (At. %) |      |      |      |     |
|----------------------------|------------------|------|------|------|-----|
|                            | C                | O    | Na   | Co   | N   |
| NaCoO_Fresh                | 26.9             | 49.0 | 10.2 | 13.9 | 0.0 |
| NaCoO_NO <sub>2</sub> _dry | 22.3             | 49.1 | 9.8  | 15.7 | 3.1 |
| NaCoO_NO <sub>2</sub> _wet | 24.6             | 48.3 | 13.5 | 11.4 | 2.2 |

**Table S2.** The peak-fitting results of N 1s high-resolution signal of fresh and NO<sub>2</sub>-exposed NaCoO samples.

| Sample                     | Assignment                   | $E_B$ (eV) | FWHM (eV) | At. % |
|----------------------------|------------------------------|------------|-----------|-------|
| NaCoO_NO <sub>2</sub> _dry | NO <sub>2</sub> <sup>-</sup> | 403.8      | 2.4       | 33.7  |
|                            | NO <sub>3</sub> <sup>-</sup> | 407.5      | 2.7       | 66.3  |
| NaCoO_NO <sub>2</sub> _wet | NO <sub>2</sub> <sup>-</sup> | 404.1      | 2.0       | 33.6  |
|                            | NO <sub>3</sub> <sup>-</sup> | 406.5      | 2.3       | 66.4  |

**Table S3.** The peak-fitting results of Na 1s high-resolution signal of fresh and NO<sub>2</sub>-exposed NaCoO samples.

| Sample                     | Assignment                    | $E_B$ (eV) | FWHM (eV) | At. % |
|----------------------------|-------------------------------|------------|-----------|-------|
| NaCoO_Fresh                | Na <sup>+<sub>esc</sub></sup> | 1070.4     | 1.4       | 20.9  |
|                            | Na <sup>+<sub>fsc</sub></sup> | 1071.6     | 1.9       | 79.1  |
| NaCoO_NO <sub>2</sub> _dry | Na <sup>+<sub>esc</sub></sup> | 1071.0     | 1.9       | 49.2  |
|                            | Na <sup>+<sub>fsc</sub></sup> | 1072.2     | 2.3       | 50.8  |
| NaCoO_NO <sub>2</sub> _wet | Na <sup>+<sub>esc</sub></sup> | 1071.2     | 1.9       | 26.8  |
|                            | Na <sup>+<sub>fsc</sub></sup> | 1072.7     | 2.1       | 38.6  |
|                            | Na <sup>+<sub>-OH</sub></sup> | 1074.3     | 2.1       | 34.6  |

**Table S4.** The peak-fitting results of Co 2p<sub>3/2</sub> high-resolution signal of fresh and NO<sub>2</sub>-exposed NaCoO samples.

| Sample                     | Assignment       | $E_B$ (eV) | FWHM (eV) | At. % |
|----------------------------|------------------|------------|-----------|-------|
| NaCoO_Fresh                | Co <sup>3+</sup> | 779.6      | 1.4       | 53.2  |
|                            | Co <sup>2+</sup> | 780.8      | 2.5       | 46.8  |
|                            | Satellite        | 782.4      | 3.2       | -     |
|                            | Satellite        | 788.0      | 2.5       | -     |
| NaCoO_NO <sub>2</sub> _dry | Co <sup>3+</sup> | 779.7      | 1.5       | 56.0  |

|                                 |                  |       |     |      |
|---------------------------------|------------------|-------|-----|------|
|                                 | Co <sup>2+</sup> | 781.0 | 1.9 | 44.0 |
|                                 | Satellite        | 782.6 | 2.5 | -    |
|                                 | Satellite        | 789.8 | 2.7 | -    |
| <b>NaCoO_NO<sub>2</sub>_wet</b> | Co <sup>3+</sup> | 779.7 | 2.0 | 37.5 |
|                                 | Co <sup>2+</sup> | 781.7 | 2.3 | 62.5 |
|                                 | Satellite        | 783.5 | 2.6 | -    |
|                                 | Satellite        | 790.3 | 2.5 | -    |

**Table S5.** The peak-fitting results of O 1s high-resolution signal of fresh and NO<sub>2</sub>-exposed NaCoO samples.

| <b>Sample</b>                   | <b>Assignment</b> | <b><i>E<sub>B</sub></i> (eV)</b> | <b>FWHM (eV)</b> | <b>At. %</b> |
|---------------------------------|-------------------|----------------------------------|------------------|--------------|
| <b>NaCoO_Fresh</b>              | O–Na              | 529.8                            | 1.1              | 16.8         |
|                                 | O–Co              | 530.7                            | 1.4              | 28.4         |
|                                 | O–H               | 532.0                            | 1.5              | 30.3         |
|                                 | H <sub>2</sub> O  | 533.1                            | 1.9              | 21.1         |
|                                 | Na Auger          | 534.8                            | 2.0              | 3.4          |
| <b>NaCoO_NO<sub>2</sub>_dry</b> | O–Na              | 529.7                            | 1.1              | 15.6         |
|                                 | O–Co              | 530.6                            | 1.3              | 27.2         |
|                                 | O–H/O–N*          | 531.9                            | 1.8              | 28.2         |
|                                 | H <sub>2</sub> O  | 533.4                            | 1.9              | 21.5         |
|                                 | Na Auger          | 535.1                            | 1.9              | 7.5          |
| <b>NaCoO_NO<sub>2</sub>_wet</b> | O–Na              | 529.8                            | 1.5              | 10.1         |
|                                 | O–Co              | 531.3                            | 1.7              | 20.6         |
|                                 | O–H/O–N           | 532.6                            | 1.8              | 30.2         |
|                                 | H <sub>2</sub> O  | 534.1                            | 1.9              | 26.2         |
|                                 | Na Auger          | 535.4                            | 2.0              | 12.9         |
